# Supplementary material for: Towards the Development of a Pan-European Stochastic Precipitation Dataset
Source: Copernicus journal article supplement (doi:10.5194/hess-2019-77), 2019-02-21
Supplement: Supplementary file 1 [file hess-2019-77-supplement.pdf]

2 Supplementary Material for

3 **Towards the Development of a Pan-European Stochastic**  
4 **Precipitation Dataset**

5 L.-A. Kautz<sup>1</sup>, F. Ehmele<sup>1</sup>, P. Ludwig<sup>1</sup>, H. S. Lentink<sup>1</sup>, F. D. Kelemen<sup>1,2</sup>, M. Kadlec<sup>3</sup>, and J. G. Pinto<sup>1</sup>

6 <sup>1</sup>Institute of Meteorology and Climate Research, Karlsruhe Institute of Technology, Karlsruhe, Germany

7 <sup>2</sup>now at: Institute for Atmospheric and Environmental Sciences, Goethe University Frankfurt, Frankfurt am Main,  
8 Germany

9 <sup>3</sup>Impact Forecasting, Aon, Prague, Czech Republic

10 **0. Contents of this file**

11 1. Evaluation of bias correction methods in a climatological perspective

12 2. Added value of bias correction for extreme precipitation events

13 Tables S1 to S5

14 Figures S1 to S3

15 **1. Evaluation of bias correction methods in a climatological perspective**

16 Tables S1, S2, S3, and S4 contain the results of the evaluation of the tested bias correction methods  
17 for the Elbe, Oder, Rhine, and Vistula catchments. The results are already discussed in Sect. 4 of the  
18 main paper.

19 **2. Added value of bias correction for extreme precipitation events**

20 Figure S1 shows the time evolution of the Rhine flood in May 1983. Figures S2 and S3 show the  
21 precipitation pattern for the 1997 and 2002 flooding events. The results are already discussed in  
22 Sect. 5 of the main paper. Table S5 shows the added value of bias correction for the top ten river  
23 floods between 1979 and 2010 for ERA20C-CCLM.

24 **Table S1.** Root mean square error (RMSE), Pearson’s correlation coefficients (R) and Taylor’s skill  
 25 scores (S) for the raw model runs plus for the model runs with different bias corrections just for the  
 26 Elbe catchment: linear scaling (LS), local intensity scaling (LOCI), power transformation (PT),  
 27 empirical quantile mapping (EQM), and quantile mapping with gamma distribution (GQM). Results  
 28 of ERAI-CCLM based on RPI and of ERA20C-CCLM on RPII. Best values of each measure are  
 29 print in bold.

|                             | ERAI-CCLM    |              |              | ERA20C-CCLM  |              |              |
|-----------------------------|--------------|--------------|--------------|--------------|--------------|--------------|
|                             | RMSE         | R            | S            | RMSE         | R            | S            |
| raw                         | 2.178        | 0.641        | 0.950        | 2.454        | 0.509        | 0.952        |
| LS <sub>monthly</sub>       | 2.224        | 0.640        | 0.948        | 2.551        | 0.506        | 0.947        |
| LS <sub>seasonal</sub>      | 2.220        | 0.641        | 0.948        | 2.549        | 0.505        | 0.946        |
| LS <sub>half-yearly</sub>   | 2.225        | 0.637        | 0.946        | 2.542        | 0.503        | 0.946        |
| LOCI <sub>monthly</sub>     | 2.268        | 0.640        | 0.944        | 2.605        | 0.505        | 0.941        |
| LOCI <sub>seasonal</sub>    | 2.265        | 0.640        | 0.945        | 2.603        | 0.504        | 0.941        |
| LOCI <sub>half-yearly</sub> | 2.269        | 0.637        | 0.943        | 2.596        | 0.502        | 0.941        |
| PT <sub>monthly</sub>       | 2.105        | 0.659        | 0.960        | 2.406        | 0.528        | 0.965        |
| PT <sub>seasonal</sub>      | 2.108        | 0.657        | 0.959        | 2.409        | 0.527        | 0.964        |
| PT <sub>half-yearly</sub>   | 2.110        | 0.656        | 0.958        | 2.409        | 0.526        | 0.963        |
| EQM <sub>monthly</sub>      | 2.154        | <b>0.662</b> | <b>0.961</b> | 2.466        | <b>0.531</b> | <b>0.965</b> |
| EQM <sub>seasonal</sub>     | 2.164        | 0.659        | 0.959        | 2.476        | 0.528        | 0.962        |
| EQM <sub>half-yearly</sub>  | 2.177        | 0.655        | 0.957        | 2.482        | 0.525        | 0.961        |
| GQM <sub>monthly</sub>      | <b>2.101</b> | 0.657        | 0.958        | <b>2.401</b> | 0.527        | 0.964        |
| GQM <sub>seasonal</sub>     | 2.108        | 0.655        | 0.957        | 2.410        | 0.524        | 0.962        |
| GQM <sub>half-yearly</sub>  | 2.116        | 0.652        | 0.955        | 2.413        | 0.521        | 0.959        |

30 **Table S2.** As in Tab. S1, but for the Oder catchment.

|                             | ERAI-CCLM    |              |              | ERA20C-CCLM  |              |              |
|-----------------------------|--------------|--------------|--------------|--------------|--------------|--------------|
|                             | RMSE         | R            | S            | RMSE         | R            | S            |
| raw                         | 2.546        | 0.538        | 0.947        | 2.997        | 0.320        | 0.879        |
| LS <sub>monthly</sub>       | 2.642        | 0.547        | 0.953        | 2.976        | 0.429        | 0.949        |
| LS <sub>seasonal</sub>      | 2.650        | 0.542        | 0.950        | 2.963        | 0.425        | 0.948        |
| LS <sub>half-yearly</sub>   | 2.655        | 0.538        | 0.948        | 2.954        | 0.424        | 0.948        |
| LOCI <sub>monthly</sub>     | 2.445        | 0.548        | 0.932        | 2.767        | 0.429        | 0.952        |
| LOCI <sub>seasonal</sub>    | 2.457        | 0.543        | 0.928        | 2.764        | 0.425        | 0.948        |
| LOCI <sub>half-yearly</sub> | 2.462        | 0.539        | 0.925        | 2.759        | 0.423        | 0.946        |
| PT <sub>monthly</sub>       | 2.455        | <b>0.564</b> | <b>0.961</b> | 2.726        | <b>0.449</b> | <b>0.968</b> |
| PT <sub>seasonal</sub>      | 2.462        | 0.562        | 0.959        | 2.727        | 0.448        | 0.967        |
| PT <sub>half-yearly</sub>   | 2.468        | 0.560        | 0.958        | 2.728        | 0.447        | 0.966        |
| EQM <sub>monthly</sub>      | <b>2.430</b> | 0.564        | 0.956        | <b>2.726</b> | 0.448        | 0.967        |
| EQM <sub>seasonal</sub>     | 2.460        | 0.555        | 0.951        | 2.739        | 0.443        | 0.963        |
| EQM <sub>half-yearly</sub>  | 2.469        | 0.551        | 0.949        | 2.747        | 0.440        | 0.961        |
| GQM <sub>monthly</sub>      | 2.465        | 0.561        | 0.959        | 2.737        | 0.447        | 0.967        |
| GQM <sub>seasonal</sub>     | 2.490        | 0.554        | 0.955        | 2.748        | 0.442        | 0.963        |
| GQM <sub>half-yearly</sub>  | 2.498        | 0.550        | 0.953        | 2.748        | 0.439        | 0.961        |

31 **Table S3.** As in Tab. S1, but for the Rhine catchment.

|                             | ERA1-CCLM    |              |              | ERA20C-CCLM  |              |              |
|-----------------------------|--------------|--------------|--------------|--------------|--------------|--------------|
|                             | RMSE         | R            | S            | RMSE         | R            | S            |
| raw                         | 2.693        | 0.745        | 0.945        | 2.992        | 0.647        | 0.951        |
| LS <sub>monthly</sub>       | 2.638        | 0.743        | 0.947        | 3.032        | 0.643        | 0.949        |
| LS <sub>seasonal</sub>      | 2.635        | 0.743        | 0.948        | 3.035        | 0.642        | 0.948        |
| LS <sub>half-yearly</sub>   | 2.630        | 0.743        | 0.948        | 3.026        | 0.642        | 0.948        |
| LOCI <sub>monthly</sub>     | 2.691        | 0.743        | 0.945        | 3.094        | 0.643        | 0.946        |
| LOCI <sub>seasonal</sub>    | 2.688        | 0.743        | 0.945        | 3.096        | 0.642        | 0.946        |
| LOCI <sub>half-yearly</sub> | 2.683        | 0.743        | 0.945        | 3.087        | 0.641        | 0.946        |
| PT <sub>monthly</sub>       | 2.526        | 0.761        | <b>0.957</b> | 2.916        | 0.663        | <b>0.960</b> |
| PT <sub>seasonal</sub>      | 2.534        | 0.759        | 0.956        | 2.919        | 0.662        | 0.960        |
| PT <sub>half-yearly</sub>   | 2.536        | 0.759        | 0.956        | 2.921        | 0.661        | 0.960        |
| EQM <sub>monthly</sub>      | 2.616        | <b>0.763</b> | 0.955        | 3.008        | <b>0.665</b> | 0.959        |
| EQM <sub>seasonal</sub>     | 2.627        | 0.761        | 0.954        | 3.016        | 0.663        | 0.958        |
| EQM <sub>half-yearly</sub>  | 2.635        | 0.759        | 0.953        | 3.025        | 0.660        | 0.957        |
| GQM <sub>monthly</sub>      | <b>2.523</b> | 0.759        | 0.956        | <b>2.910</b> | 0.661        | 0.959        |
| GQM <sub>seasonal</sub>     | 2.536        | 0.757        | 0.955        | 2.919        | 0.659        | 0.958        |
| GQM <sub>half-yearly</sub>  | 2.542        | 0.756        | 0.955        | 2.915        | 0.659        | 0.958        |

32

33 **Table S4.** As in Tab. S1, but for the Vistula catchment.

|                             | ERA1-CCLM    |              |              | ERA20C-CCLM  |              |              |
|-----------------------------|--------------|--------------|--------------|--------------|--------------|--------------|
|                             | RMSE         | R            | S            | RMSE         | R            | S            |
| raw                         | 2.545        | 0.533        | 0.952        | 2.986        | 0.283        | 0.849        |
| LS <sub>monthly</sub>       | 2.648        | 0.534        | 0.956        | 2.833        | 0.438        | 0.940        |
| LS <sub>seasonal</sub>      | 2.632        | 0.535        | <b>0.956</b> | 2.816        | 0.437        | 0.942        |
| LS <sub>half-yearly</sub>   | 2.635        | 0.533        | 0.956        | 2.806        | 0.435        | 0.942        |
| LOCI <sub>monthly</sub>     | 2.421        | 0.531        | 0.853        | 2.590        | 0.433        | 0.939        |
| LOCI <sub>seasonal</sub>    | 2.419        | 0.531        | 0.849        | 2.583        | 0.432        | 0.937        |
| LOCI <sub>half-yearly</sub> | 2.421        | 0.530        | 0.848        | 2.579        | 0.429        | 0.933        |
| PT <sub>monthly</sub>       | 2.425        | <b>0.550</b> | 0.944        | 2.524        | <b>0.465</b> | <b>0.965</b> |
| PT <sub>seasonal</sub>      | 2.428        | 0.548        | 0.943        | 2.526        | 0.463        | 0.964        |
| PT <sub>half-yearly</sub>   | 2.426        | 0.549        | 0.943        | 2.529        | 0.461        | 0.962        |
| EQM <sub>monthly</sub>      | <b>2.405</b> | 0.546        | 0.926        | <b>2.518</b> | 0.462        | 0.962        |
| EQM <sub>seasonal</sub>     | 2.414        | 0.543        | 0.924        | 2.529        | 0.458        | 0.959        |
| EQM <sub>half-yearly</sub>  | 2.409        | 0.544        | 0.924        | 2.539        | 0.453        | 0.956        |
| GQM <sub>monthly</sub>      | 2.442        | 0.547        | 0.946        | 2.541        | 0.461        | 0.963        |
| GQM <sub>seasonal</sub>     | 2.447        | 0.545        | 0.945        | 2.547        | 0.458        | 0.961        |
| GQM <sub>half-yearly</sub>  | 2.442        | 0.546        | 0.944        | 2.555        | 0.453        | 0.957        |

34 **Table S5.** Top 10 events of the five investigated river catchments for the time period from 1979 to  
 35 2010. The events are identified as the ten highest catchment-averaged 7-day running means of  
 36 precipitation from E-OBS. The indicated dates (YYYY-MM-DD) address the timing of the peak  
 37 value. Events where bias correction (EQM monthly) do not have an added value and the ERA20C-  
 38 CCLM shows large differences towards observations are printed in italic (-) Events which are  
 39 already captured well in ERA20C-CCLM, so that bias correction cannot lead to a further  
 40 improvement, are printed standard (0). Events where bias correction has an added value are in bold  
 41 print (+). The underlined events are very well captured.

| Top 10 | Rhine                 | Danube                | Elbe                  | Oder                  | Vistula               |
|--------|-----------------------|-----------------------|-----------------------|-----------------------|-----------------------|
| 1      | <b>1991-12-19</b> (+) | <i>2002-08-09</i> (-) | <i>2002-08-09</i> (-) | <i>1997-07-06</i> (-) | <i>2010-09-03</i> (-) |
| 2      | 1998-10-26 (0)        | <b>1979-06-16</b> (+) | <i>1983-08-04</i> (-) | <b>1981-07-21</b> (+) | <i>2006-08-09</i> (-) |
| 3      | 1986-10-22 (0)        | <b>1981-07-18</b> (+) | <i>1986-12-30</i> (-) | <b>1996-07-09</b> (+) | <i>1992-09-04</i> (-) |
| 4      | <u>1995-01-25</u> (0) | <b>2009-06-22</b> (+) | <i>1997-07-18</i> (-) | <i>1995-08-31</i> (-) | <i>2009-06-22</i> (-) |
| 5      | <u>1990-02-13</u> (0) | <b>1985-08-04</b> (+) | <b>1981-07-21</b> (+) | <b>2001-07-18</b> (+) | <i>1997-07-06</i> (-) |
| 6      | <u>1993-12-22</u> (0) | <b>1995-08-29</b> (+) | <b>1998-10-29</b> (+) | <i>2010-07-20</i> (-) | 2007-07-07 (0)        |
| 7      | <i>1983-05-23</i> (-) | <b>2002-03-21</b> (+) | <i>2010-09-26</i> (-) | <i>2002-08-13</i> (-) | <i>1995-09-01</i> (-) |
| 8      | <u>2004-01-11</u> (0) | <i>2006-08-04</i> (-) | <b>1995-08-29</b> (+) | <i>2006-08-05</i> (-) | <i>2001-07-23</i> (-) |
| 9      | <b>1984-09-07</b> (+) | <b>2003-10-06</b> (+) | <b>1996-07-08</b> (+) | <u>1986-06-02</u> (0) | <i>2010-05-15</i> (-) |
| 10     | <u>1983-11-27</u> (0) | <b>1991-07-30</b> (+) | <u>2001-09-10</u> (0) | <i>1980-07-06</i> (0) | <i>1980-10-11</i> (-) |

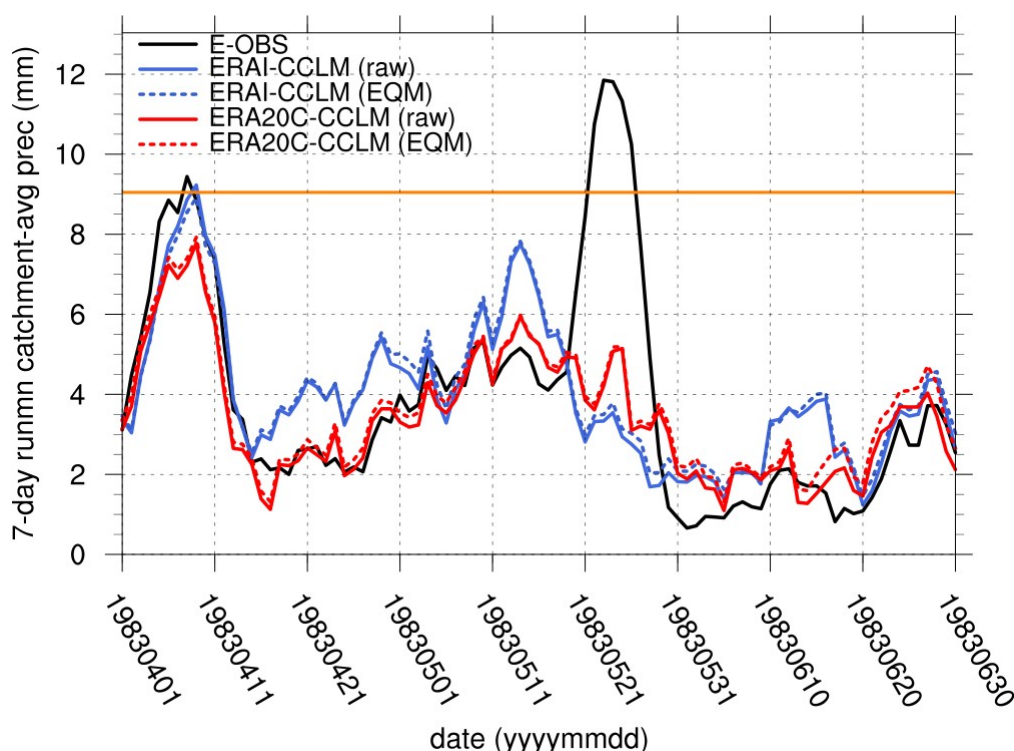

42 **Figure S1.** Time series of the 7-day running mean (in mm) averaged over the Rhine catchment. The  
 43 orange line marks the 99<sup>th</sup> percentile of the daily precipitation sum from E-OBS based on the time  
 44 period between 1979 and 2010.

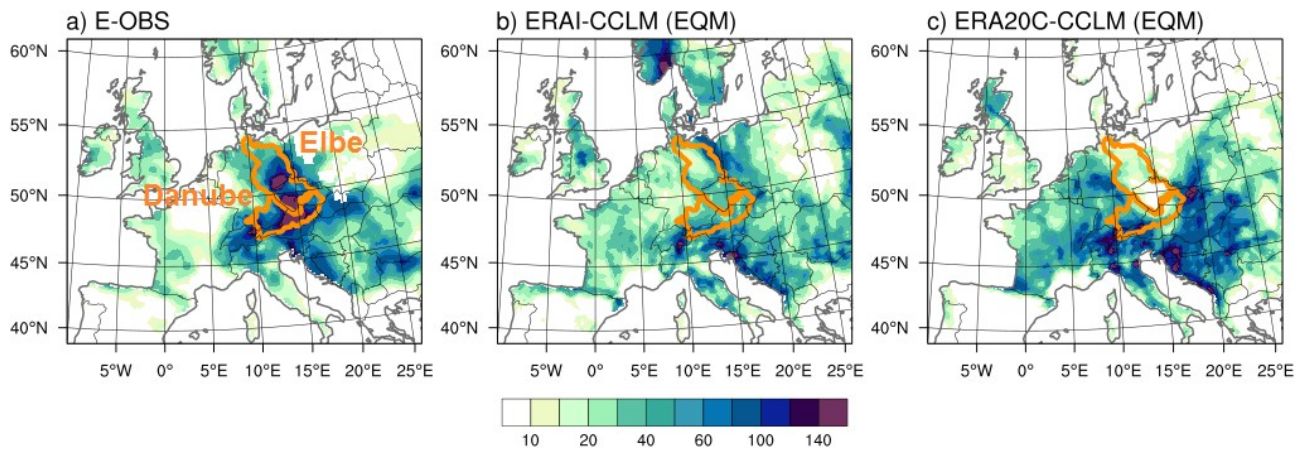

45 **Figure S2.** 7-day precipitation sum (in mm) for 7 to 13 August 2002 in a) E-OBS, b) ERAI-CCLM,  
 46 and c) ERA20C-CCLM. Orange lines mark the relevant river catchments.

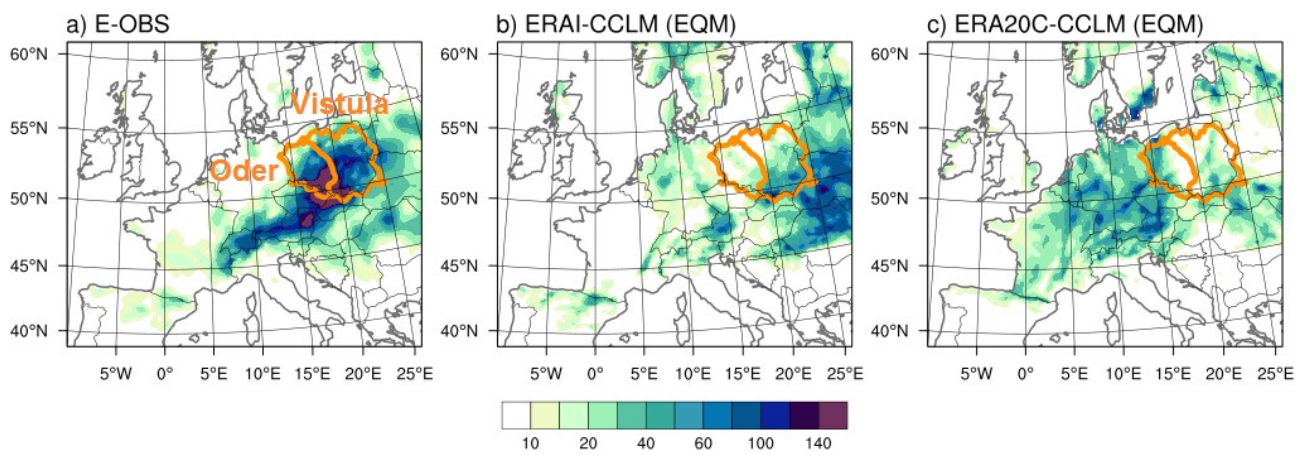

47 **Figure S3.** 7-day precipitation sum (in mm) for 3 to 8 July 1997 in a) E-OBS, b) ERAI-CCLM, and  
 48 c) ERA20C-CCLM. Orange lines mark the relevant river catchments.
